# Supplementary material
Source: PubMed Central journal article supplement (PMC2628454)
Supplement: NIHMS74606-supplement-supplement_1.pdf [file NIHMS74606-supplement-supplement_1.pdf]

## METHODS

**Structure determination and refinement.** The *T. thermophilus* RNAP holoenzyme was purified and crystallized as described previously<sup>20</sup>. To obtain the complex crystals, the crystals of the apo-holoenzyme were transferred for 3 h into the drops containing collection buffer and 2 mM of dMyx<sup>4</sup>. The data were collected at beam line GM/CA-CAT (Advanced Photon Source, Argonne, USA). The crystals, although belonging to the same space group  $P3_2$ , had distinct unit cell parameters,  $a = b = 235 \text{ \AA}$ ,  $c = 255 \text{ \AA}$ , as compared to the two previously studied *T. thermophilus* RNAP crystal forms; form I ( $a = b = 236 \text{ \AA}$ ,  $c = 250 \text{ \AA}$ )<sup>20–22</sup> and form II ( $a = b = 240 \text{ \AA}$ ,  $c = 253 \text{ \AA}$ )<sup>23–25</sup>. The data were processed using the HKL2000 data processing package (Supplementary Table 1)<sup>26</sup>. As all previous holo-RNAP crystals, the crystals of the RNAP–dMyx complex were characterized by the perfect merohedral twinning coupled with the non-crystallographic symmetry<sup>20</sup>. Refinement, therefore, was carried out using the twinning option of the CNS program (Supplementary Table 1)<sup>27</sup>. The RNAP structure from the RNAP–Tgt complex (PDB accession 2BE5), from which the bridge helix ( $\beta'1067$ – $1104$ ) and the switch-2 segment ( $\beta'602$ – $621$ ) were omitted, was used as a starting model. Zonal scaling correction<sup>10</sup> substantially improved the initial  $R_{\text{free}}$  and the quality of the electron density. The  $|2F_{\text{obs}} - F_{\text{calc}}|$  electron density map calculated after the rigid body and B-factor refinement steps revealed the undistorted bridge helix (characteristic of the crystal form II, see earlier), straightening of the switch-2  $\alpha$ -helix and a very clear electron density for dMyx. However, the unfolded C-terminal portion of the switch-2 (residues  $\beta'613$ – $619$ ) structure was represented by a fragmentary electron density that allowed for alternative interpretations. After several trials, using the reduced level of the electron density ( $\sim 0.8\sigma$ , which was still above the noise) we were able to build a proper model that was characterized by a good, continuous electron density in the  $|2F_{\text{obs}} - F_{\text{calc}}|$  electron density map for both the side- and main-chain atoms (note that all the previous partially wrong models did not improve the quality of the electron density in this region). After modelling of dMyx and switch-2 structures in the omit electron density, several rounds of the B-factor, positional, simulated annealing refinements and water 'pick' and water 'delete' procedures, alternating by manual model building using the program O<sup>28</sup> yielded a final  $R_{\text{factor}}$  of 24.0% and  $R_{\text{free}}$  of 27.0% for the RNAP–dMyx complex at 2.7  $\text{\AA}$  resolution (Supplementary Table 1). The final model was of high quality as shown by the simulated annealing omit electron density map calculated for dMyx and the switch-2 motif (Supplementary Fig. 1). Structural figures were prepared using programs Molscript<sup>29</sup>, Bobscript<sup>30</sup> and Raster3D<sup>31</sup>.

**Isolation and assay of mutant *E. coli* RNAPs.** Core wild-type and mutationally altered RNAPs were purified as described previously<sup>18</sup> except that the ionic strength was maintained at or above 0.2 M at all chromatographic steps. Overexpression plasmids for  $\beta'$  R339A (pIA830),  $\beta$  E1279A (pIA870),  $\beta$  S1322E (pIA878),  $\beta'$  G336A (pIA880),  $\beta'$  F338A (pIA881),  $\beta'$  K345A (pIA882),  $\beta'$   $\Delta$ 333–335G (pIA883),  $\beta'$  K334A (pIA879) and  $\beta'$  R337A (pGB055) were constructed by site-directed mutagenesis and the sequenced fragments were recloned into pVS10-based vectors<sup>18</sup>. Holoenzymes were reconstituted with the twofold molar excess of  $\sigma^{70}$ . For steady-state abortive initiation assays, holo RNAP (20 nM) in 16  $\mu\text{l}$  of 20 mM Tris-acetate, 20 mM sodium acetate, 2 mM magnesium acetate, 5% glycerol, 1 mM dithiothreitol (DTT), 0.1 mM EDTA, pH 7.9, 1  $\mu\text{M}$   $\sigma^{70}$ , were supplemented with desired concentration of dMyx (2  $\mu\text{l}$ ) and incubated for 15 min at 37 °C. Transcription was initiated by adding linear T7A1 promoter template (100 nM), ApU (200  $\mu\text{M}$ ), CTP (25  $\mu\text{M}$ ) and 3  $\mu\text{Ci}$  [ $\alpha^{32}\text{P}$ ]-CTP (final reaction volume 20  $\mu\text{l}$ ). Reactions were allowed to proceed for 15 min at 37 °C and quenched by the addition of an equal volume of saturated urea in 90 mM Tris-borate, pH 8.3, 20 mM EDTA. Products were

analysed on 7 M urea, 12% (w/v) acrylamide:bisacrylamide (19:1) denaturing gels and RNA quantities were determined from Phosphorimager scans of the gels. dMyx IC<sub>50</sub> values for wild-type and variant RNAPs were determined by fitting concentration dependencies to hyperbolic function. The assay was repeated at least three times for each variant tested.

**Footprinting analysis.** A linear 153-bp DNA fragment containing  $\lambda\text{P}_R$  promoter was made by PCR amplification using pIA226 (ref. 25) as a template with primers 17 (5'-CGTTAAATCTATCACCGCAAGGG) and 138 (5'-ATCGCCTGAAAGACTAGTCAGG). The top (non-template) DNA strand primer (number 17) was end-labelled with [<sup>32</sup>P]- $\gamma$ -ATP (Perkin Elmer) and polynucleotide kinase (Epicentre) and purified using G-50 spin columns (GE Healthcare). PCR products were gel-purified using a kit (Promega). Sequencing reactions were performed using the same labelled primer with a SequiTherm kit (Epicentre). For DNaseI protection experiments, wild-type holo *E. coli* RNAP (400 nM) was pre-incubated with 1  $\mu\text{M}$  of Myx or an equal volume of 50% ethanol for 15 min at 37 °C in GBB buffer (20 mM Tris-HCl, 14 mM MgCl<sub>2</sub>, 20 mM NaCl, 5% glycerol, 1 mM DTT, 0.1 mM EDTA, pH 7.9) supplemented with 1 mM CaCl<sub>2</sub>. A labelled  $\lambda\text{P}_R$  promoter fragment was added (at 20 nM) and the reaction was incubated for a further 10 min. Samples were shifted to room temperature (22 °C) and treated with 0.002 U of DNaseI (Roche, 10 U  $\mu\text{l}^{-1}$ ) for 1 min. The reaction was stopped by the addition of an equal volume of buffer containing 15 mM EDTA and 8 M urea. For potassium permanganate probing, holo RNAP (400 nM) was pre-incubated with 1  $\mu\text{M}$  of myxopyronin or an equal volume of 50% ethanol, 0.5% dimethylsulphoxide for 15 min at 37 °C in GBB buffer without reducing agents. Labelled  $\lambda\text{P}_R$  promoter fragment was added (at 20 nM), and the reaction was incubated for a further 10 min. Samples were shifted to room temperature and treated with KMnO<sub>4</sub> at a final concentration of 10 mM for 60 s. The reaction was stopped by the addition of 5 $\times$  stop buffer (1.5 M sodium acetate, pH 5.2, 80 mM EDTA, 6 M  $\beta$ -mercaptoethanol), samples were subjected to phenol-chloroform extraction and precipitated with ethanol. The pellet was dissolved in 20  $\mu\text{l}$  of water and incubated with 100  $\mu\text{l}$  of 0.5 M piperidine at 95 °C for 20 min. After another round of ethanol precipitation, DNA was dissolved on 96% formamide. Samples were heated at 95 °C for 3 min and analysed on 7 M urea, 8% (w/v) acrylamide:bisacrylamide (19:1) denaturing gels.

- Vassilyeva, M. N. *et al.* Purification, crystallization and initial crystallographic analysis of RNA polymerase holoenzyme from *Thermus thermophilus*. *Acta Crystallogr. D* **58**, 1497–1500 (2002).
- Artsimovitch, I. *et al.* Structural basis for transcription regulation by alarmone ppGpp. *Cell* **117**, 299–310 (2004).
- Vassilyev, D. G. *et al.* Crystal structure of a bacterial RNA polymerase holoenzyme at 2.6  $\text{\AA}$  resolution. *Nature* **417**, 712–719 (2002).
- Artsimovitch, I. *et al.* Allosteric modulation of the RNA polymerase catalytic reaction is an essential component of transcription control by rifamycins. *Cell* **122**, 351–363 (2005).
- Temiakov, D. *et al.* Structural basis of transcription inhibition by antibiotic streptolydigin. *Mol. Cell* **19**, 655–666 (2005).
- Vassilyev, D. G. *et al.* Structural basis for transcription inhibition by tagetitoxin. *Nature Struct. Mol. Biol.* **12**, 1086–1093 (2005).
- Otwinowski, Z. & Minor, W. Processing X-ray diffraction data collected in oscillation mode. *Methods Enzymol.* **276**, 307–326 (1997).
- Brunger, A. T. *et al.* Crystallography & NMR system: A new software suite for macromolecular structure determination. *Acta Crystallogr. D* **54**, 905–921 (1998).
- Jones, T. A., Zou, J. Y., Cowan, S. W. & Kjeldgaard, M. Improved methods for building protein models in electron density maps and the location of errors in these models. *Acta Crystallogr. A* **47**, 110–119 (1991).
- Kraulis, P. J. MOLSCRIPT: a program to produce both detailed and schematic plots of protein structures. *J. Appl. Crystallogr.* **24**, 946–950 (1991).
- Esnouf, R. M. Further additions to MolScript version 1.4, including reading and contouring of electron-density maps. *Acta Crystallogr. D* **55**, 938–940 (1999).
- Merritt, E. A. & Bacon, D. J. Raster3D: photorealistic molecular graphics. *Methods Enzymol.* **277**, 505–524 (1997).
